# Supplementary material
Source: publisher figshare collection journal article supplement (https://acs.figshare.com/ndownloader/files/22207185)
Supplement: Supplementary file 1 [file 22207185]

Supplementary material:

Compound **5c** 1,4-{(Me3Si)(*i*Pr2Ga)C=C(H)-}2C6H4

Table 1. Atomic Coordinates and Equivalent Isotropic Displacement Parameters of **5c**

Table 2. Bond Length (Å) and Bond Angels (deg) of **5c**

Table 3. Anisotropic Displacement Parameters of **5c**

Table 4. Hydrogen Coordinates of **5c**

Table 1. Atomic coordinates ( x 10^4) and equivalent isotropic

displacement parameters (pm^2 x 10^-1) for 5c. U(eq) is defined

as one third of the trace of the orthogonalized Uij-Tensor.

________________________________________________________________

x y z U(eq)

________________________________________________________________

Ga(1) 2423(1) -2947(1) 7131(1) 32(1)

C(11) 519(6) -4246(5) 7702(4) 38(1)

C(12) 406(8) -5050(7) 6734(6) 62(2)

C(13) -1024(7) -3373(7) 8110(7) 65(2)

C(14) 4488(6) -3848(6) 6326(6) 56(1)

C(15) 5719(7) -2716(7) 5588(6) 62(2)

C(16) 5063(9) -5212(9) 7215(9) 114(4)

Si(11) 3111(1) -616(1) 8739(1) 33(1)

C(111) 2097(7) 1030(7) 9365(5) 52(1)

C(112) 5239(6) -151(8) 8038(6) 58(1)

C(113) 2923(10) -2468(7) 10038(6) 73(2)

C(1) 2239(5) -902(4) 7524(3) 27(1)

C(2) 1382(5) 255(4) 6931(4) 29(1)

C(21) 700(5) 164(4) 5922(4) 26(1)

C(22) -769(5) 881(5) 5808(4) 30(1)

C(23) 1459(5) -693(5) 5076(4) 30(1)

________________________________________________________________

Table 2. Bond length [pm] and angels [deg] for 5c.

_________________________________________________________________

Ga(1)-C(11) 196.8(5)

Ga(1)-C(14) 197.3(5)

Ga(1)-C(1) 197.4(4)

C(11)-C(13) 149.7(7)

C(11)-C(12) 152.0(7)

C(14)-C(15) 145.0(8)

C(14)-C(16) 147.1(9)

Si(11)-C(112) 183.8(6)

Si(11)-C(111) 184.4(5)

Si(11)-C(113) 184.9(6)

Si(11)-C(1) 185.4(4)

C(1)-C(2) 132.7(5)

C(2)-C(21) 146.8(5)

C(21)-C(22) 137.9(5)

C(21)-C(23) 138.9(5)

C(22)-C(23)#1 137.3(6)

C(23)-C(22)#1 137.3(6)

C(11)-Ga(1)-C(14) 118.0(2)

C(11)-Ga(1)-C(1) 119.02(17)

C(14)-Ga(1)-C(1) 122.7(2)

C(13)-C(11)-C(12) 110.5(5)

C(13)-C(11)-Ga(1) 113.9(3)

C(12)-C(11)-Ga(1) 112.3(3)

C(15)-C(14)-C(16) 113.2(6)

C(15)-C(14)-Ga(1) 115.6(3)

C(16)-C(14)-Ga(1) 112.0(5)

C(112)-Si(11)-C(111) 107.8(3)

C(112)-Si(11)-C(113) 109.9(3)

C(111)-Si(11)-C(113) 109.4(3)

C(112)-Si(11)-C(1) 109.2(2)

C(111)-Si(11)-C(1) 112.1(2)

C(113)-Si(11)-C(1) 108.5(2)

C(2)-C(1)-Si(11) 120.5(3)

C(2)-C(1)-Ga(1) 117.2(3)

Si(11)-C(1)-Ga(1) 122.2(2)

C(1)-C(2)-C(21) 124.5(3)

C(22)-C(21)-C(23) 117.0(4)

C(22)-C(21)-C(2) 121.0(3)

C(23)-C(21)-C(2) 122.0(3)

C(23)#1-C(22)-C(21) 120.7(4)

C(22)#1-C(23)-C(21) 122.2(4)

_________________________________________________________________

Symmetry transformations used to generate equivalent atoms: #1 -x,-y,-z+1

Table 3. Anisotropic displacement parameters [pm^2 x 10^-1]

for 5c. The anisotropic displacement factor takes the form:

-2 pi^2 [ (h*a)^2 U11 + ... + 2 h k a* b* U12 ]

_______________________________________________________________________

U11 U22 U33 U23 U13 U12

_______________________________________________________________________

Ga(1) 35(1) 27(1) 36(1) -10(1) -11(1) 3(1)

C(11) 45(3) 29(2) 40(2) -10(2) -10(2) -3(2)

C(12) 67(4) 53(3) 76(4) -34(3) -13(3) -13(3)

C(13) 45(3) 51(3) 94(5) -29(3) 3(3) -9(2)

C(14) 43(3) 45(3) 80(4) -30(3) -8(3) 8(2)

C(15) 44(3) 59(3) 70(4) -18(3) 3(3) 5(2)

C(16) 62(4) 73(5) 143(8) 32(5) -7(5) 31(4)

Si(11) 38(1) 37(1) 29(1) -10(1) -18(1) 0(1)

C(111) 50(3) 65(3) 55(3) -33(3) -20(2) 1(2)

C(112) 38(3) 93(4) 63(3) -45(3) -21(2) 3(3)

C(113) 112(6) 57(3) 58(3) 6(3) -53(4) -13(3)

C(1) 29(2) 26(2) 27(2) -7(2) -9(2) -3(1)

C(2) 32(2) 28(2) 32(2) -10(2) -16(2) 1(2)

C(21) 27(2) 24(2) 30(2) -4(1) -11(2) -3(1)

C(22) 33(2) 31(2) 28(2) -8(2) -12(2) 4(2)

C(23) 28(2) 33(2) 32(2) -8(2) -13(2) 4(2)

_______________________________________________________________________

Table 4. Hydrogen coordinates ( x 10^4) and isotropic

displacement parameters (pm^2 x 10^-1) for 5c.

________________________________________________________________

x y z U(eq)

________________________________________________________________

H(11) 649 -5075 8431 46

H(12A) -471 -5757 7085 74

H(12B) 1389 -5638 6507 74

H(12C) 229 -4264 5999 74

H(13A) -1207 -2532 7406 78

H(13B) -963 -2940 8766 78

H(13C) -1893 -4088 8418 78

H(14) 4245 -4280 5729 67

H(15A) 5978 -2188 6122 75

H(15B) 5332 -1951 4935 75

H(15C) 6662 -3259 5216 75

H(16A) 6091 -5582 6800 137

H(16B) 4313 -6044 7504 137

H(16C) 5160 -4899 7920 137

H(11A) 2713 1285 9852 62

H(11B) 1047 724 9890 62

H(11C) 2002 1940 8679 62

H(11D) 5662 123 8632 70

H(11E) 5339 723 7293 70

H(11F) 5828 -1057 7821 70

H(11G) 3512 -3312 9723 88

H(11H) 1812 -2724 10381 88

H(11I) 3348 -2331 10684 88

H(2) 1195 1217 7178 35

H(22) -1316 1518 6354 36

H(23) 2502 -1171 5111 36

_______________________________________________________________

Supplementary material:

Compound **6** 1,4-{(Me3Si)(*t*Bu2Ga)C=C(H)-}2C6H4

Table 1. Atomic Coordinates and Equivalent Isotropic Displacement Parameters of **6**

Table 2. Bond Length (Å) and Bond Angels (deg) of **6**

Table 3. Anisotropic Displacement Parameters of **6**

Table 4. Hydrogen Coordinates of **6**

Table 1. Atomic coordinates ( x 10^4) and equivalent isotropic

displacement parameters (pm^2 x 10^-1) for 6. U(eq) is defined as

one third of the trace of the orthogonalized Uij tensor.

________________________________________________________________

x y z U(eq)

________________________________________________________________

Ga(1) 2052(1) 5553(1) 1933(1) 26(1)

CT1 1228(2) 4046(4) 2102(3) 38(1)

CT11 435(2) 4746(5) 2200(5) 88(2)

CT12 1089(2) 3041(5) 1076(3) 64(1)

CT13 1545(2) 3095(5) 3117(3) 63(1)

CT2 1822(2) 7632(3) 1399(2) 33(1)

CT21 1844(3) 8580(4) 2434(3) 62(1)

CT22 1006(2) 7816(5) 637(3) 65(1)

CT23 2452(3) 8193(4) 798(4) 63(1)

Si(1) 3673(1) 3903(1) 1505(1) 30(1)

C(11) 4726(2) 4464(4) 1554(3) 43(1)

C(12) 3579(2) 1854(3) 1695(3) 41(1)

C(13) 3114(2) 4351(4) 60(3) 49(1)

C(1) 3176(2) 4974(3) 2479(2) 27(1)

C(2) 3478(2) 5485(3) 3514(2) 30(1)

C(21) 4264(2) 5210(3) 4256(2) 26(1)

C(22) 4587(2) 6297(3) 5040(2) 29(1)

C(23) 5307(2) 6094(3) 5753(2) 30(1)

________________________________________________________________

Table 2. Bond lengths [pm] and angles [deg] for 6.

________________________________________________________________

Ga(1)-C(1) 197.8(3)

Ga(1)-CT2 199.5(3)

Ga(1)-CT1 199.9(3)

CT1-CT13 151.5(5)

CT1-CT11 152.5(5)

CT1-CT12 152.7(5)

CT2-CT23 151.0(4)

CT2-CT21 152.0(5)

CT2-CT22 152.5(5)

Si(1)-C(11) 186.5(3)

Si(1)-C(1) 186.6(3)

Si(1)-C(12) 186.9(3)

Si(1)-C(13) 187.6(3)

C(1)-C(2) 134.9(4)

C(2)-C(21) 148.6(4)

C(21)-C(23)#1 138.6(4)

C(21)-C(22) 140.3(4)

C(22)-C(23) 137.2(4)

C(23)-C(21)#1 138.6(4)

C(1)-Ga(1)-CT2 118.18(12)

C(1)-Ga(1)-CT1 116.58(12)

CT2-Ga(1)-CT1 124.96(13)

CT13-CT1-CT11 110.3(3)

CT13-CT1-CT12 108.0(3)

CT11-CT1-CT12 108.4(3)

CT13-CT1-Ga(1) 108.9(2)

CT11-CT1-Ga(1) 112.8(2)

CT12-CT1-Ga(1) 108.2(2)

CT23-CT2-CT21 108.6(3)

CT23-CT2-CT22 108.9(3)

CT21-CT2-CT22 108.3(3)

CT23-CT2-Ga(1) 111.0(2)

CT21-CT2-Ga(1) 106.5(2)

CT22-CT2-Ga(1) 113.5(2)

C(11)-Si(1)-C(1) 113.77(14)

C(11)-Si(1)-C(12) 111.75(16)

C(1)-Si(1)-C(12) 111.61(14)

C(11)-Si(1)-C(13) 106.20(17)

C(1)-Si(1)-C(13) 106.15(14)

C(12)-Si(1)-C(13) 106.80(16)

C(2)-C(1)-Si(1) 129.6(2)

C(2)-C(1)-Ga(1) 113.0(2)

Si(1)-C(1)-Ga(1) 117.35(14)

C(1)-C(2)-C(21) 130.2(3)

C(23)#1-C(21)-C(22) 117.3(3)

C(23)#1-C(21)-C(2) 123.6(3)

C(22)-C(21)-C(2) 119.0(3)

C(23)-C(22)-C(21) 121.4(3)

C(22)-C(23)-C(21)#1 121.2(3)

_______________________________________________________________________

Symmetry transformations used to generate equivalent atoms:

#1 -x+1,-y+1,-z+1

Table 3. Anisotropic displacement parameters [pm^2 x 10^-1]

for 6. The anisotropic displacement factor exponent takes the form:

-2 pi^2 [ h^2 a*^2 U11 + ... + 2 h k a* b* U12 ]

_______________________________________________________________________

U11 U22 U33 U23 U13 U12

_______________________________________________________________________

Ga(1) 24(1) 30(1) 22(1) 0(1) 3(1) -1(1)

CT1 34(2) 36(2) 40(2) 6(1) 1(1) -3(1)

CT11 48(2) 71(3) 158(5) 26(3) 51(3) 1(2)

CT12 61(3) 62(3) 64(3) -3(2) 1(2) -28(2)

CT13 72(3) 63(3) 50(2) 19(2) 3(2) -21(2)

CT2 37(2) 32(2) 30(2) 3(1) 4(1) -1(1)

CT21 90(3) 50(2) 45(2) -7(2) 14(2) 13(2)

CT22 68(3) 52(2) 65(3) 19(2) -12(2) 0(2)

CT23 81(3) 40(2) 76(3) 11(2) 39(2) -4(2)

Si(1) 30(1) 35(1) 23(1) -6(1) 3(1) 1(1)

C(11) 38(2) 60(2) 35(2) -5(2) 13(1) -6(2)

C(12) 43(2) 38(2) 41(2) -8(2) 3(2) 3(2)

C(13) 55(2) 59(2) 28(2) -11(2) -1(2) 8(2)

C(1) 27(1) 26(1) 27(1) -1(1) 3(1) -1(1)

C(2) 27(1) 38(2) 25(1) -1(1) 4(1) 5(1)

C(21) 26(1) 35(2) 18(1) -1(1) 5(1) 0(1)

C(22) 34(2) 30(2) 22(1) -1(1) 6(1) 5(1)

C(23) 36(2) 32(2) 20(1) -5(1) 5(1) -1(1)

_______________________________________________________________________

Table 4. Hydrogen coordinates ( x 10^4) and isotropic

displacement parameters (pm^2 x 10^-1) for 6.

________________________________________________________________

x y z U(eq)

________________________________________________________________

HT1A 237 5331 1547 106

HT1B 511 5370 2850 106

HT1C 59 3978 2266 106

HT1D 718 2272 1162 77

HT1E 1585 2601 997 77

HT1F 877 3617 423 77

HT1G 1618 3698 3777 75

HT1H 2045 2668 3047 75

HT1I 1171 2316 3169 75

HT2A 2363 8519 2907 74

HT2B 1452 8225 2832 74

HT2C 1730 9594 2217 74

HT2D 929 8837 416 78

HT2E 600 7520 1028 78

HT2F 977 7206 -14 78

HT2G 2361 9226 623 75

HT2H 2426 7639 121 75

HT2I 2968 8070 1268 75

H(11A) 4779 5516 1676 52

H(11B) 4873 4216 859 52

H(11C) 5069 3949 2152 52

H(12A) 3819 1589 2448 50

H(12B) 3843 1338 1187 50

H(12C) 3026 1584 1548 50

H(13A) 2556 4184 16 59

H(13B) 3300 3726 -470 59

H(13C) 3201 5373 -105 59

H(2) 3130 6127 3821 36

H(22) 4298 7202 5079 34

H(23) 5517 6869 6267 36

________________________________________________________________

Supplementary material:

Compound **7b** 1,3,5-{(Me3Si)(*n*Pr2Ga)C=C(H)-}3C6H3

Table 1. Atomic Coordinates and Equivalent Isotropic Displacement Parameters of **7b**

Table 2. Bond Length (Å) and Bond Angels (deg) of **7b**

Table 3. Anisotropic Displacement Parameters of **7b**

Table 4. Hydrogen Coordinates of **7b**

Table 1. Atomic coordinates ( x 10^4) and equivalent isotropic

displacement parameters (pm^2 x 10^-1) for 7b. U(eq) is defined as

one third of the trace of the orthogonalized Uij tensor.

________________________________________________________________

x y z U(eq)

________________________________________________________________

Ga(12) 1860(1) 514(1) 3847(1) 31(1)

C(124) 1019(5) -12(3) 4422(4) 42(2)

C(125) 1008(5) -685(3) 4215(5) 49(2)

C(126) 530(7) -825(3) 3319(5) 78(3)

C(127) 1724(5) 1404(2) 3931(4) 38(2)

C(128) 1139(5) 1623(3) 4620(4) 46(2)

C(129) 1614(6) 1503(3) 5548(4) 55(2)

Ga(32) 3037(1) -715(1) 7648(1) 39(1)

C(324) 3713(5) -1117(3) 8725(4) 42(2)

C(325) 3741(5) -1811(3) 8721(4) 48(2)

C(326) 4233(6) -2061(3) 8010(5) 66(2)

C(327) 1967(5) -1101(4) 6817(5) 63(2)

C(328) 1227(6) -1472(4) 7222(5) 68(2)

C(329) 690(6) -1097(4) 7787(6) 79(3)

Ga(52) 4139(1) -2133(1) 4226(1) 41(1)

C(524) 2726(5) -2196(3) 4219(4) 46(2)

C(525) 2430(5) -2378(4) 5056(5) 67(2)

C(526) 1318(5) -2436(3) 4999(6) 68(2)

C(527) 4676(7) -2223(3) 3135(4) 75(3)

C(528) 4179(11) -1721(6) 2439(7) 45(3)

C(52A) 3985(18) -2172(15) 2292(12) 45(3)

C(529) 4207(10) -1881(5) 1514(7) 77(3)

C(52B) 4319(14) -2095(9) 2212(9) 39(3)

C(52C) 3855(16) -1496(8) 2126(13) 39(3)

Si(12) 2607(1) 337(1) 1916(1) 25(1)

C(121) 2840(30) 1138(6) 1690(30) 93(12)

C(122) 1316(11) 172(14) 1410(20) 77(10)

C(123) 3419(17) -135(13) 1350(20) 94(12)

C(12A) 2430(20) 1159(6) 1730(20) 58(7)

C(12B) 1514(12) -62(13) 1330(20) 55(7)

C(12C) 3719(14) 109(13) 1490(20) 67(8)

Si(32) 3073(1) 704(1) 8325(1) 31(1)

C(321) 4155(4) 718(3) 9228(4) 46(2)

C(322) 2789(5) 1480(3) 7886(4) 52(2)

C(323) 2012(4) 412(3) 8802(4) 48(2)

Si(52) 5727(1) -2801(1) 5752(1) 29(1)

C(521) 6377(5) -2742(3) 6908(4) 48(2)

C(522) 6642(5) -2973(3) 5033(4) 45(2)

C(523) 4811(5) -3424(3) 5639(6) 65(2)

C(1) 3804(4) -297(2) 4460(3) 21(1)

C(11) 3542(4) -146(2) 3516(3) 22(1)

C(12) 2781(4) 186(2) 3124(3) 22(1)

C(3) 3808(4) -79(2) 6012(3) 23(1)

C(31) 3566(4) 329(2) 6705(3) 24(1)

C(32) 3306(4) 152(2) 7467(3) 27(1)

C(5) 4559(4) -1017(2) 5602(3) 20(1)

C(51) 5087(4) -1588(2) 5858(3) 22(1)

C(52) 5045(4) -2095(2) 5368(3) 21(1)

C(2) 3593(4) 79(2) 5122(3) 21(1)

C(4) 4309(4) -626(2) 6243(3) 21(1)

C(6) 4315(4) -837(2) 4722(3) 20(1)

________________________________________________________________

Table 2. Bond lengths [pm] and angles [deg] for 7b.

________________________________________________________________

Ga(12)-C(124) 196.4(5)

Ga(12)-C(127) 197.7(5)

Ga(12)-C(12) 197.8(5)

C(124)-C(125) 151.7(8)

C(125)-C(126) 145.6(10)

C(127)-C(128) 152.6(7)

C(128)-C(129) 148.9(8)

Ga(32)-C(324) 196.7(6)

Ga(32)-C(327) 197.2(7)

Ga(32)-C(32) 197.6(6)

C(324)-C(325) 153.0(9)

C(325)-C(326) 149.6(8)

C(327)-C(328) 153.0(9)

C(328)-C(329) 149.2(11)

Ga(52)-C(524) 196.3(6)

Ga(52)-C(527) 196.8(6)

Ga(52)-C(52) 197.4(5)

C(524)-C(525) 147.8(9)

C(525)-C(526) 153.5(9)

C(527)-C(52B) 144.9(14)

C(527)-C(52A) 147.7(16)

C(527)-C(528) 161.0(12)

C(528)-C(529) 147.6(12)

C(52A)-C(529) 144.0(16)

C(52B)-C(52C) 146.4(16)

Si(12)-C(121) 183.8(13)

Si(12)-C(12A) 184.3(12)

Si(12)-C(12B) 184.6(12)

Si(12)-C(12C) 185.1(12)

Si(12)-C(122) 185.6(13)

Si(12)-C(123) 185.8(13)

Si(12)-C(12) 186.5(5)

Si(32)-C(321) 185.6(6)

Si(32)-C(322) 185.7(6)

Si(32)-C(32) 186.7(5)

Si(32)-C(323) 187.3(6)

Si(52)-C(521) 185.4(6)

Si(52)-C(523) 185.8(7)

Si(52)-C(52) 186.2(5)

Si(52)-C(522) 186.6(6)

C(1)-C(2) 138.6(6)

C(1)-C(6) 140.6(7)

C(1)-C(11) 147.4(6)

C(11)-C(12) 133.7(7)

C(3)-C(2) 139.4(7)

C(3)-C(4) 140.5(7)

C(3)-C(31) 148.2(7)

C(31)-C(32) 134.7(7)

C(5)-C(6) 139.6(6)

C(5)-C(4) 140.2(6)

C(5)-C(51) 147.3(7)

C(51)-C(52) 134.5(7)

C(124)-Ga(12)-C(127) 119.0(2)

C(124)-Ga(12)-C(12) 122.3(2)

C(127)-Ga(12)-C(12) 118.6(2)

C(125)-C(124)-Ga(12) 117.9(4)

C(126)-C(125)-C(124) 113.1(6)

C(128)-C(127)-Ga(12) 115.3(4)

C(129)-C(128)-C(127) 114.5(5)

C(324)-Ga(32)-C(327) 123.0(3)

C(324)-Ga(32)-C(32) 118.7(2)

C(327)-Ga(32)-C(32) 117.7(3)

C(325)-C(324)-Ga(32) 117.1(4)

C(326)-C(325)-C(324) 112.7(5)

C(328)-C(327)-Ga(32) 116.6(5)

C(329)-C(328)-C(327) 112.5(6)

C(524)-Ga(52)-C(527) 121.2(4)

C(524)-Ga(52)-C(52) 119.0(2)

C(527)-Ga(52)-C(52) 119.3(3)

C(525)-C(524)-Ga(52) 116.6(5)

C(524)-C(525)-C(526) 114.0(7)

C(52B)-C(527)-C(52A) 20.7(10)

C(52B)-C(527)-C(528) 34.8(9)

C(52A)-C(527)-C(528) 39.2(13)

C(52B)-C(527)-Ga(52) 134.8(10)

C(52A)-C(527)-Ga(52) 117.4(12)

C(528)-C(527)-Ga(52) 108.5(6)

C(529)-C(528)-C(527) 113.5(10)

C(529)-C(52A)-C(527) 124.5(16)

C(52A)-C(529)-C(528) 41.9(14)

C(527)-C(52B)-C(52C) 109.4(14)

C(121)-Si(12)-C(12A) 18.2(16)

C(121)-Si(12)-C(12B) 122(2)

C(12A)-Si(12)-C(12B) 108.5(11)

C(121)-Si(12)-C(12C) 90.5(15)

C(12A)-Si(12)-C(12C) 107.8(11)

C(12B)-Si(12)-C(12C) 111.0(10)

C(121)-Si(12)-C(122) 107.4(12)

C(12A)-Si(12)-C(122) 92.1(18)

C(12B)-Si(12)-C(122) 19.0(14)

C(12C)-Si(12)-C(122) 127.0(13)

C(121)-Si(12)-C(123) 108.0(12)

C(12A)-Si(12)-C(123) 123.5(16)

C(12B)-Si(12)-C(123) 90.9(13)

C(12C)-Si(12)-C(123) 21.5(14)

C(122)-Si(12)-C(123) 108.4(11)

C(121)-Si(12)-C(12) 111.2(13)

C(12A)-Si(12)-C(12) 108.8(11)

C(12B)-Si(12)-C(12) 110.9(11)

C(12C)-Si(12)-C(12) 109.8(11)

C(122)-Si(12)-C(12) 109.0(11)

C(123)-Si(12)-C(12) 112.6(12)

C(321)-Si(32)-C(322) 110.4(3)

C(321)-Si(32)-C(32) 108.9(3)

C(322)-Si(32)-C(32) 113.2(3)

C(321)-Si(32)-C(323) 107.4(3)

C(322)-Si(32)-C(323) 109.2(3)

C(32)-Si(32)-C(323) 107.6(3)

C(521)-Si(52)-C(523) 110.5(3)

C(521)-Si(52)-C(52) 112.3(3)

C(523)-Si(52)-C(52) 106.7(3)

C(521)-Si(52)-C(522) 108.7(3)

C(523)-Si(52)-C(522) 108.7(3)

C(52)-Si(52)-C(522) 110.0(3)

C(2)-C(1)-C(6) 117.0(5)

C(2)-C(1)-C(11) 123.1(5)

C(6)-C(1)-C(11) 119.9(4)

C(12)-C(11)-C(1) 127.3(4)

C(11)-C(12)-Si(12) 120.1(4)

C(11)-C(12)-Ga(12) 118.9(4)

Si(12)-C(12)-Ga(12) 121.1(3)

C(2)-C(3)-C(4) 118.2(5)

C(2)-C(3)-C(31) 121.5(5)

C(4)-C(3)-C(31) 120.2(5)

C(32)-C(31)-C(3) 125.7(5)

C(31)-C(32)-Si(32) 122.4(4)

C(31)-C(32)-Ga(32) 119.4(4)

Si(32)-C(32)-Ga(32) 118.0(3)

C(6)-C(5)-C(4) 117.5(5)

C(6)-C(5)-C(51) 121.8(4)

C(4)-C(5)-C(51) 120.7(4)

C(52)-C(51)-C(5) 126.1(5)

C(51)-C(52)-Si(52) 123.2(4)

C(51)-C(52)-Ga(52) 119.5(4)

Si(52)-C(52)-Ga(52) 117.1(3)

C(1)-C(2)-C(3) 122.7(5)

C(5)-C(4)-C(3) 121.5(5)

C(5)-C(6)-C(1) 122.9(4)

___________________________________________________________________________

Table 3. Anisotropic displacement parameters [pm^2 x 10^-1]

for 7b. The anisotropic displacement factor exponent takes the form:

-2 pi^2 [ h^2 a*^2 U11 + ... + 2 h k a* b* U12 ]

_______________________________________________________________________

U11 U22 U33 U23 U13 U12

_______________________________________________________________________

Ga(12) 31(1) 38(1) 27(1) 2(1) 11(1) 1(1)

C(124) 44(4) 48(4) 40(4) 3(3) 27(3) -7(3)

C(125) 49(4) 49(4) 52(4) 8(3) 20(4) -7(3)

C(126) 122(8) 65(5) 52(5) -7(4) 32(5) -46(5)

C(127) 49(4) 35(3) 31(3) 5(3) 10(3) 7(3)

C(128) 55(4) 46(4) 37(4) -3(3) 7(3) 23(3)

C(129) 74(5) 55(4) 36(4) -3(3) 12(4) 21(4)

Ga(32) 41(1) 50(1) 27(1) 4(1) 7(1) -3(1)

C(324) 44(4) 50(4) 31(3) 10(3) 4(3) 4(3)

C(325) 43(4) 61(5) 45(4) 24(3) 19(3) 7(4)

C(326) 85(6) 51(5) 75(6) 24(4) 44(5) 9(4)

C(327) 68(5) 75(5) 38(4) -5(4) -11(4) -37(4)

C(328) 54(5) 74(6) 66(6) 15(4) -18(4) -29(4)

C(329) 52(5) 82(6) 104(8) 23(6) 14(5) -15(5)

Ga(52) 54(1) 39(1) 27(1) -1(1) 2(1) 0(1)

C(524) 38(4) 47(4) 45(4) 5(3) -11(3) -7(3)

C(525) 41(4) 110(7) 51(5) 7(5) 11(4) 17(4)

C(526) 47(5) 61(5) 96(7) 16(5) 10(5) 1(4)

C(527) 142(8) 55(5) 35(3) -9(3) 34(5) 10(5)

C(528) 51(7) 53(8) 37(6) -14(5) 26(5) -24(6)

C(52A) 51(7) 53(8) 37(6) -14(5) 26(5) -24(6)

C(529) 95(9) 91(8) 45(5) 0(5) 15(6) -33(7)

C(52B) 44(8) 55(8) 22(6) -9(5) 18(5) -40(6)

C(52C) 44(8) 55(8) 22(6) -9(5) 18(5) -40(6)

Si(12) 28(1) 37(1) 12(1) 5(1) 6(1) 2(1)

C(121) 180(30) 72(14) 33(11) 20(11) 30(20) -46(15)

C(122) 70(13) 130(30) 29(12) 23(15) 10(10) -12(13)

C(123) 120(20) 140(20) 22(11) 20(15) 26(18) 90(20)

C(12A) 120(20) 42(10) 20(8) 8(7) 22(13) 8(10)

C(12B) 51(11) 93(19) 17(8) -8(10) -1(9) -43(12)

C(12C) 44(10) 130(20) 26(14) 30(13) 20(10) 34(12)

Si(32) 34(1) 43(1) 17(1) -4(1) 8(1) 9(1)

C(321) 37(4) 75(5) 26(3) -11(3) 4(3) 11(3)

C(322) 75(5) 49(4) 33(4) -9(3) 12(4) 21(4)

C(323) 42(4) 63(4) 43(4) -6(3) 20(3) 9(3)

Si(52) 27(1) 30(1) 31(1) 2(1) 7(1) 5(1)

C(521) 61(5) 51(4) 34(4) 10(3) 11(4) 20(4)

C(522) 44(4) 54(4) 38(4) -5(3) 11(3) 14(3)

C(523) 44(4) 34(4) 114(7) 18(4) 3(5) 2(3)

C(1) 18(3) 29(3) 16(3) 2(2) 2(2) -5(2)

C(11) 24(3) 30(3) 14(2) -3(2) 9(2) -3(2)

C(12) 21(3) 26(3) 19(3) 1(2) 9(2) -1(2)

C(3) 19(3) 31(3) 21(3) -1(2) 9(2) -6(2)

C(31) 25(3) 26(3) 20(3) -1(2) 3(2) 6(2)

C(32) 25(3) 37(3) 19(3) 0(2) 2(2) 8(3)

C(5) 15(3) 28(3) 16(2) 4(2) 2(2) -1(2)

C(51) 18(3) 37(3) 12(2) 4(2) 4(2) 0(2)

C(52) 18(3) 33(3) 14(2) 2(2) 4(2) -1(2)

C(2) 20(3) 24(3) 18(3) -1(2) 4(2) -2(2)

C(4) 21(3) 28(3) 14(2) 2(2) 3(2) -3(2)

C(6) 17(3) 29(3) 15(2) -3(2) 5(2) -4(2)

_______________________________________________________________________

Table 4. Hydrogen coordinates ( x 10^4) and isotropic

displacement parameters (pm^2 x 10^-1) for 7b.

________________________________________________________________

x y z U(eq)

________________________________________________________________

H(12A) 1214 35 5047 50

H(12B) 359 136 4269 50

H(12C) 1670 -831 4303 58

H(12D) 675 -896 4620 58

H(12E) -113 -650 3209 93

H(12F) 480 -1257 3246 93

H(12G) 909 -661 2910 93

H(12H) 2367 1579 4062 46

H(12I) 1415 1555 3365 46

H(12J) 1032 2052 4547 55

H(12K) 509 1429 4513 55

H(12L) 1665 1073 5645 66

H(12M) 1226 1678 5941 66

H(12N) 2256 1680 5657 66

H(32A) 4376 -972 8845 51

H(32B) 3405 -990 9205 51

H(32C) 4082 -1951 9282 58

H(32D) 3083 -1964 8643 58

H(32E) 3877 -1939 7445 80

H(32F) 4247 -2496 8045 80

H(32G) 4891 -1909 8084 80

H(32H) 1617 -789 6457 75

H(32I) 2254 -1363 6435 75

H(32J) 762 -1653 6758 82

H(32K) 1564 -1794 7571 82

H(32L) 1139 -962 8298 95

H(32M) 183 -1336 7968 95

H(32N) 404 -752 7458 95

H(52A) 2434 -1810 4048 55

H(52B) 2457 -2484 3774 55

H(52C) 2676 -2085 5500 81

H(52D) 2729 -2761 5238 81

H(52E) 1018 -2045 4877 82

H(52F) 1181 -2584 5550 82

H(52G) 1059 -2713 4536 82

H(52H) 5374 -2169 3258 90

H(52I) 4539 -2623 2896 90

H(52J) 3509 -1667 2504 54

H(52K) 4511 -1341 2573 54

H(52L) 3787 -2578 2121 54

H(52M) 3415 -1971 2424 54

H(52N) 3852 -2399 1968 46

H(52O) 4853 -2104 1894 46

H(52P) 3532 -1426 2618 46

H(52Q) 3384 -1479 1590 46

H(52R) 4345 -1190 2115 46

H(52A) 3898 -1588 1117 46

H(52B) 4897 -1913 1468 46

H(52C) 3912 -2276 1374 46

H(52D) 3772 -1974 979 46

H(52E) 4133 -1478 1692 46

H(52F) 4878 -1948 1427 46

H(12O) 2664 1215 1073 111

H(12P) 3524 1226 1885 111

H(12Q) 2458 1392 2008 111

H(12R) 894 469 1609 92

H(12S) 1142 -225 1591 92

H(12T) 1244 188 784 92

H(12U) 3304 -40 736 113

H(12V) 3281 -557 1431 113

H(12W) 4090 -53 1602 113

H(12$) 2994 1373 2034 70

H(12) 1859 1289 1946 70

H(12S) 2351 1242 1109 70

H(12$) 947 67 1552 66

H(12) 1600 -492 1409 66

H(12S) 1429 30 708 66

H(12$) 3631 196 870 80

H(12) 3830 -317 1583 80

H(12S) 4273 331 1793 80

H(32O) 4255 322 9487 55

H(32P) 4044 1005 9669 55

H(32Q) 4724 836 8995 55

H(32R) 3337 1635 7653 62

H(32S) 2661 1740 8352 62

H(32T) 2223 1467 7427 62

H(32U) 1435 409 8355 57

H(32V) 1908 669 9279 57

H(32W) 2150 7 9018 57

H(52N) 6889 -2445 6945 58

H(52O) 6655 -3128 7100 58

H(52P) 5923 -2621 7278 58

H(52Q) 6313 -3014 4433 54

H(52R) 6975 -3345 5223 54

H(52S) 7110 -2648 5074 54

H(52T) 4364 -3355 6038 79

H(52U) 5140 -3804 5775 79

H(52V) 4454 -3433 5045 79

H(11) 3966 -304 3141 26

H(31) 3596 758 6603 28

H(51) 5500 -1599 6428 27

H(2) 3286 463 4962 25

H(4) 4483 -734 6854 25

H(6) 4505 -1092 4277 24

________________________________________________________________

Supplementary material:

Compound **8** 1,3,5-{(Me3Si)(*t*Bu2Ga)C=C(H)-}3C6H3

Table 1. Atomic Coordinates and Equivalent Isotropic Displacement Parameters of **8**

Table 2. Bond Length (Å) and Bond Angels (deg) of **8**

Table 3. Anisotropic Displacement Parameters of **8**

Table 4. Hydrogen Coordinates of **8**

Table 1. Atomic coordinates ( x 10^4) and equivalent isotropic

displacement parameters (pm^2 x 10^-1) for 8. U(eq) is defined as

one third of the trace of the orthogonalized Uij tensor.

________________________________________________________________

x y z U(eq)

________________________________________________________________

C(1) 2203(3) 535(2) 2655(2) 28(1)

C(2) 1321(3) 645(2) 3131(2) 29(1)

C(3) 1315(3) 1519(2) 3536(2) 29(1)

C(4) 2240(3) 2298(2) 3470(2) 30(1)

C(5) 3119(3) 2220(2) 2994(2) 29(1)

C(6) 3116(3) 1333(2) 2605(2) 29(1)

C(11) 2097(3) -413(2) 2205(2) 31(1)

C(12) 2287(3) -718(2) 1510(2) 28(1)

C(31) 346(3) 1663(2) 4005(2) 30(1)

C(32) -982(3) 1168(2) 3881(2) 32(1)

C(51) 4022(3) 3045(2) 2885(2) 32(1)

C(52) 3714(3) 3797(2) 2802(2) 31(1)

Ga(12) 1828(1) -2085(1) 1102(1) 34(1)

CT1 3357(4) -2636(2) 1104(2) 44(1)

CT11 4590(4) -2033(3) 937(2) 61(1)

CT12 3774(4) -2670(3) 1918(2) 64(1)

CT13 2912(4) -3623(2) 547(2) 68(1)

CT2 -165(4) -2837(2) 866(2) 53(1)

CT21 -600(30) -3746(10) 231(9) 121(8)

CT22 -1180(20) -2327(15) 664(13) 112(8)

CT23 -370(30) -3060(14) 1592(8) 141(10)

CT2A -676(18) -3431(7) 44(5) 77(3)

CT2B -1015(14) -2206(10) 1055(8) 101(5)

CT2C -291(19) -3497(8) 1345(6) 88(3)

Si(12) 2651(1) -91(1) 804(1) 34(1)

C(121) 2017(4) -1042(2) -144(2) 46(1)

C(122) 1688(4) 749(2) 752(2) 52(1)

C(123) 4532(3) 506(2) 940(2) 46(1)

Ga(32) -1975(1) 1747(1) 4573(1) 35(1)

CT3 -2326(4) 1308(3) 5445(2) 59(1)

CT31 -2170(20) 371(8) 5366(15) 81(4)

CT32 -3848(9) 1254(9) 5466(6) 70(3)

CT33 -1428(12) 2052(11) 6194(6) 121(6)

CT3A -2550(20) 267(8) 5212(17) 80(5)

CT3B -3397(14) 1534(14) 5821(8) 107(5)

CT3C -873(11) 1716(12) 6024(7) 111(6)

CT4 -2300(4) 2886(2) 4396(2) 44(1)

CT41 -2317(4) 2883(3) 3580(2) 52(1)

CT42 -1040(4) 3705(3) 4933(2) 70(1)

CT43 -3614(4) 3025(3) 4585(2) 65(1)

Si(32) -2163(1) 174(1) 3043(1) 38(1)

C(321) -1941(4) 296(3) 2103(2) 51(1)

C(322) -2097(4) -993(2) 3098(2) 60(1)

C(323) -3933(3) 213(2) 3106(2) 50(1)

Ga(52) 5308(1) 4739(1) 2714(1) 38(1)

CT5 6256(3) 5902(2) 3601(2) 48(1)

CT51 5379(7) 6568(4) 3630(4) 67(2)

CT52 7673(7) 6436(6) 3609(5) 90(3)

CT53 6294(10) 5661(5) 4344(4) 87(3)

CT5A 5412(15) 6104(13) 4107(10) 141(8)

CT5B 6866(18) 6682(8) 3294(8) 116(6)

CT5C 7489(15) 5686(9) 4018(8) 93(5)

CT6 5934(4) 4412(3) 1761(2) 58(1)

CT61 5776(5) 5095(4) 1345(3) 90(2)

CT62 7437(6) 4453(4) 1950(3) 99(2)

CT63 5043(7) 3440(4) 1243(3) 139(3)

Si(52) 1982(1) 3973(1) 2636(1) 37(1)

C(521) 542(3) 2898(2) 2041(2) 51(1)

C(522) 2117(4) 4815(3) 2082(2) 60(1)

C(523) 1554(4) 4521(3) 3535(2) 57(1)

________________________________________________________________

Table 2. Bond lengths [pm] and angles [deg] for 8.

________________________________________________________________

C(1)-C(2) 139.7(4)

C(1)-C(6) 139.6(4)

C(1)-C(11) 147.4(4)

C(2)-C(3) 138.9(4)

C(3)-C(4) 139.2(4)

C(3)-C(31) 146.8(4)

C(4)-C(5) 138.6(4)

C(5)-C(6) 139.3(4)

C(5)-C(51) 147.3(4)

C(11)-C(12) 133.4(4)

C(12)-Si(12) 186.8(3)

C(12)-Ga(12) 197.8(3)

C(31)-C(32) 134.0(4)

C(32)-Si(32) 186.4(3)

C(32)-Ga(32) 197.6(3)

C(51)-C(52) 133.5(4)

C(52)-Si(52) 187.2(3)

C(52)-Ga(52) 197.5(3)

Ga(12)-CT1 199.2(3)

Ga(12)-CT2 200.3(3)

CT1-CT11 151.3(5)

CT1-CT12 152.4(5)

CT1-CT13 152.7(4)

CT2-CT2A 149.6(9)

CT2-CT2B 150.3(9)

CT2-CT21 150.4(11)

CT2-CT23 151.9(12)

CT2-CT2C 152.6(9)

CT2-CT22 152.8(12)

Si(12)-C(122) 185.7(3)

Si(12)-C(123) 187.2(3)

Si(12)-C(121) 188.0(3)

Ga(32)-CT3 197.7(4)

Ga(32)-CT4 199.6(3)

CT3-CT3B 148.4(10)

CT3-CT31 149.1(11)

CT3-CT3A 152.2(11)

CT3-CT33 152.8(9)

CT3-CT3C 155.7(10)

CT3-CT32 156.7(9)

CT4-CT41 152.0(5)

CT4-CT43 152.1(5)

CT4-CT42 154.2(5)

Si(32)-C(321) 186.1(4)

Si(32)-C(323) 187.5(3)

Si(32)-C(322) 187.7(4)

Ga(52)-CT6 199.2(4)

Ga(52)-CT5 200.0(3)

CT5-CT5A 142.9(11)

CT5-CT52 148.7(6)

CT5-CT5B 152.0(10)

CT5-CT53 152.5(7)

CT5-CT5C 153.7(10)

CT5-CT51 154.8(7)

CT6-CT61 149.9(6)

CT6-CT63 152.3(6)

CT6-CT62 151.6(6)

Si(52)-C(521) 186.2(3)

Si(52)-C(523) 186.5(4)

Si(52)-C(522) 186.6(4)

C(2)-C(1)-C(6) 118.3(3)

C(2)-C(1)-C(11) 118.8(3)

C(6)-C(1)-C(11) 122.9(3)

C(3)-C(2)-C(1) 121.6(3)

C(2)-C(3)-C(4) 118.3(3)

C(2)-C(3)-C(31) 123.2(3)

C(4)-C(3)-C(31) 118.4(3)

C(5)-C(4)-C(3) 121.9(3)

C(4)-C(5)-C(6) 118.4(3)

C(4)-C(5)-C(51) 121.5(3)

C(6)-C(5)-C(51) 120.0(3)

C(5)-C(6)-C(1) 121.4(3)

C(12)-C(11)-C(1) 129.6(3)

C(11)-C(12)-Si(12) 130.3(2)

C(11)-C(12)-Ga(12) 114.3(2)

Si(12)-C(12)-Ga(12) 114.65(15)

C(32)-C(31)-C(3) 129.3(3)

C(31)-C(32)-Si(32) 130.5(2)

C(31)-C(32)-Ga(32) 114.9(2)

Si(32)-C(32)-Ga(32) 112.93(15)

C(52)-C(51)-C(5) 127.7(3)

C(51)-C(52)-Si(52) 128.5(2)

C(51)-C(52)-Ga(52) 112.3(2)

Si(52)-C(52)-Ga(52) 118.70(16)

C(12)-Ga(12)-CT1 119.00(12)

C(12)-Ga(12)-CT2 116.62(13)

CT1-Ga(12)-CT2 123.65(14)

CT11-CT1-CT12 108.9(3)

CT11-CT1-CT13 109.4(3)

CT12-CT1-CT13 108.7(3)

CT11-CT1-Ga(12) 111.9(2)

CT12-CT1-Ga(12) 104.6(2)

CT13-CT1-Ga(12) 113.1(3)

CT2A-CT2-CT2B 111.0(8)

CT2A-CT2-CT21 26.4(10)

CT2B-CT2-CT21 127.1(12)

CT2A-CT2-CT23 130.9(10)

CT2B-CT2-CT23 84.7(13)

CT21-CT2-CT23 107.4(10)

CT2A-CT2-CT2C 106.8(6)

CT2B-CT2-CT2C 109.9(9)

CT21-CT2-CT2C 81.0(9)

CT23-CT2-CT2C 28.7(10)

CT2A-CT2-CT22 86.1(10)

CT2B-CT2-CT22 26.1(12)

CT21-CT2-CT22 106.4(11)

CT23-CT2-CT22 107.4(13)

CT2C-CT2-CT22 127.1(15)

CT2A-CT2-Ga(12) 110.4(7)

CT2B-CT2-Ga(12) 110.1(7)

CT21-CT2-Ga(12) 114.7(11)

CT23-CT2-Ga(12) 106.2(10)

CT2C-CT2-Ga(12) 108.5(7)

CT22-CT2-Ga(12) 114.3(11)

C(122)-Si(12)-C(12) 114.04(16)

C(122)-Si(12)-C(123) 109.23(17)

C(12)-Si(12)-C(123) 114.00(15)

C(122)-Si(12)-C(121) 107.69(16)

C(12)-Si(12)-C(121) 103.88(14)

C(123)-Si(12)-C(121) 107.50(16)

C(32)-Ga(32)-CT3 120.58(16)

C(32)-Ga(32)-CT4 113.90(13)

CT3-Ga(32)-CT4 124.90(16)

CT3B-CT3-CT31 117.1(16)

CT3B-CT3-CT3A 110.7(13)

CT31-CT3-CT3A 15.4(14)

CT3B-CT3-CT33 78.9(8)

CT31-CT3-CT33 113.6(10)

CT3A-CT3-CT33 127.8(13)

CT3B-CT3-CT3C 111.0(8)

CT31-CT3-CT3C 86.9(12)

CT3A-CT3-CT3C 102.4(9)

CT33-CT3-CT3C 34.6(9)

CT3B-CT3-CT32 26.3(7)

CT31-CT3-CT32 108.9(10)

CT3A-CT3-CT32 97.2(13)

CT33-CT3-CT32 104.9(7)

CT3C-CT3-CT32 137.1(7)

CT3B-CT3-Ga(32) 120.3(8)

CT31-CT3-Ga(32) 112.6(12)

CT3A-CT3-Ga(32) 108.3(13)

CT33-CT3-Ga(32) 109.3(6)

CT3C-CT3-Ga(32) 102.5(6)

CT32-CT3-Ga(32) 107.0(5)

CT41-CT4-CT43 110.2(3)

CT41-CT4-CT42 107.3(3)

CT43-CT4-CT42 109.4(3)

CT41-CT4-Ga(32) 111.4(2)

CT43-CT4-Ga(32) 112.8(3)

CT42-CT4-Ga(32) 105.4(2)

C(321)-Si(32)-C(32) 113.59(15)

C(321)-Si(32)-C(323) 108.02(17)

C(32)-Si(32)-C(323) 103.87(15)

C(321)-Si(32)-C(322) 110.37(18)

C(32)-Si(32)-C(322) 113.74(16)

C(323)-Si(32)-C(322) 106.64(17)

C(52)-Ga(52)-CT6 116.66(13)

C(52)-Ga(52)-CT5 118.61(13)

CT6-Ga(52)-CT5 124.59(15)

CT5A-CT5-CT52 130.6(7)

CT5A-CT5-CT5B 115.2(11)

CT52-CT5-CT5B 44.6(6)

CT5A-CT5-CT53 54.9(10)

CT52-CT5-CT53 109.5(5)

CT5B-CT5-CT53 141.8(6)

CT5A-CT5-CT5C 109.8(10)

CT52-CT5-CT5C 61.6(7)

CT5B-CT5-CT5C 106.2(9)

CT53-CT5-CT5C 57.3(7)

CT5A-CT5-CT51 51.0(10)

CT52-CT5-CT51 107.4(5)

CT5B-CT5-CT51 69.5(8)

CT53-CT5-CT51 104.7(5)

CT5C-CT5-CT51 146.6(6)

CT5A-CT5-Ga(52) 113.4(6)

CT52-CT5-Ga(52) 115.9(4)

CT5B-CT5-Ga(52) 108.4(6)

CT53-CT5-Ga(52) 109.0(3)

CT5C-CT5-Ga(52) 102.9(5)

CT51-CT5-Ga(52) 109.9(3)

CT61-CT6-CT63 108.6(4)

CT61-CT6-CT62 109.2(4)

CT63-CT6-CT62 109.6(4)

CT61-CT6-Ga(52) 108.5(3)

CT63-CT6-Ga(52) 110.1(3)

CT62-CT6-Ga(52) 110.8(3)

C(521)-Si(52)-C(523) 110.09(17)

C(521)-Si(52)-C(522) 107.28(17)

C(523)-Si(52)-C(522) 106.80(19)

C(521)-Si(52)-C(52) 113.63(15)

C(523)-Si(52)-C(52) 113.63(16)

C(522)-Si(52)-C(52) 104.83(16)

_______________________________________________________________________

Table 3. Anisotropic displacement parameters [pm^2 x 10^-1]

for 8. The anisotropic displacement factor exponent takes the form:

-2 pi^2 [ h^2 a*^2 U11 + ... + 2 h k a* b* U12 ]

_______________________________________________________________________

U11 U22 U33 U23 U13 U12

_______________________________________________________________________

C(1) 27(1) 25(1) 33(2) 11(1) 9(1) 11(1)

C(2) 29(2) 27(1) 33(2) 12(1) 10(1) 8(1)

C(3) 27(2) 29(2) 30(2) 8(1) 7(1) 8(1)

C(4) 29(2) 25(1) 32(2) 5(1) 7(1) 8(1)

C(5) 26(1) 27(1) 29(2) 6(1) 5(1) 6(1)

C(6) 28(2) 31(2) 29(2) 9(1) 11(1) 8(1)

C(11) 32(2) 22(1) 41(2) 14(1) 12(1) 7(1)

C(12) 29(2) 21(1) 37(2) 9(1) 9(1) 8(1)

C(31) 35(2) 28(2) 29(2) 9(1) 10(1) 12(1)

C(32) 34(2) 35(2) 34(2) 14(1) 13(1) 14(1)

C(51) 29(2) 26(2) 37(2) 6(1) 14(1) 2(1)

C(52) 32(2) 24(1) 30(2) 3(1) 11(1) -1(1)

Ga(12) 42(1) 21(1) 36(1) 8(1) 12(1) 7(1)

CT1 53(2) 29(2) 51(2) 9(2) 15(2) 15(2)

CT11 59(3) 57(2) 80(3) 24(2) 25(2) 31(2)

CT12 69(3) 54(2) 75(3) 32(2) 11(2) 25(2)

CT13 81(3) 39(2) 77(3) 0(2) 17(2) 30(2)

CT2 46(2) 35(2) 64(2) 11(2) 13(2) -5(2)

CT21 62(9) 65(10) 152(14) -50(11) -14(13) -7(9)

CT22 61(10) 60(10) 190(20) 29(13) 6(13) 9(8)

CT23 89(14) 180(20) 98(10) 72(12) 4(11) -67(16)

CT2A 58(6) 82(8) 66(4) 17(4) -3(4) -2(6)

CT2B 30(5) 65(6) 165(13) -9(7) 10(7) 1(4)

CT2C 86(7) 84(7) 81(6) 37(6) 27(6) -10(7)

Si(12) 39(1) 28(1) 33(1) 11(1) 9(1) 9(1)

C(121) 58(2) 42(2) 37(2) 10(2) 12(2) 14(2)

C(122) 61(2) 43(2) 52(2) 18(2) 0(2) 22(2)

C(123) 49(2) 43(2) 44(2) 13(2) 22(2) 6(2)

Ga(32) 30(1) 47(1) 32(1) 14(1) 12(1) 13(1)

CT3 49(2) 80(3) 45(2) 30(2) 16(2) 4(2)

CT31 70(9) 122(7) 73(12) 71(7) 15(8) 34(7)

CT32 77(5) 73(7) 72(8) 31(6) 60(5) 11(5)

CT33 121(9) 144(10) 33(5) 24(5) 13(6) -60(9)

CT3A 101(15) 95(6) 60(10) 57(6) 9(9) 32(7)

CT3B 134(11) 146(15) 85(12) 61(10) 74(9) 62(11)

CT3C 85(7) 169(15) 49(8) 63(8) -7(6) -20(8)

CT4 50(2) 46(2) 42(2) 10(2) 17(2) 26(2)

CT41 66(3) 47(2) 58(2) 24(2) 25(2) 27(2)

CT42 76(3) 48(2) 74(3) 3(2) 9(2) 24(2)

CT43 70(3) 89(3) 64(3) 31(2) 33(2) 52(3)

Si(32) 35(1) 33(1) 44(1) 12(1) 12(1) 7(1)

C(321) 41(2) 59(2) 41(2) 9(2) 7(2) 6(2)

C(322) 54(2) 35(2) 86(3) 16(2) 21(2) 6(2)

C(323) 37(2) 48(2) 59(2) 12(2) 11(2) 7(2)

Ga(52) 38(1) 26(1) 45(1) 10(1) 15(1) 0(1)

CT5 42(2) 29(2) 55(2) 8(2) 4(2) -6(1)

CT51 75(4) 48(4) 54(4) -10(3) 6(3) 13(3)

CT52 52(4) 76(6) 90(6) -17(4) 11(4) -21(4)

CT53 125(7) 48(4) 53(4) 11(3) -13(4) -2(4)

CT5A 62(9) 131(15) 126(14) -78(10) 30(9) -26(8)

CT5B 140(14) 32(7) 109(12) 28(7) -41(9) -38(8)

CT5C 115(10) 58(8) 70(9) -4(7) -33(8) 32(8)

CT6 70(3) 45(2) 60(2) 14(2) 39(2) 6(2)

CT61 89(4) 124(5) 78(3) 49(3) 45(3) 36(3)

CT62 131(5) 134(5) 89(4) 56(4) 74(4) 87(4)

CT63 200(7) 84(4) 87(4) -17(3) 98(4) -31(4)

Si(52) 37(1) 26(1) 45(1) 9(1) 10(1) 7(1)

C(521) 38(2) 40(2) 65(2) 15(2) 0(2) 5(2)

C(522) 59(2) 44(2) 78(3) 28(2) 9(2) 12(2)

C(523) 55(2) 49(2) 65(3) 8(2) 24(2) 21(2)

_______________________________________________________________________

Table 4. Hydrogen coordinates ( x 10^4) and isotropic

displacement parameters (pm^2 x 10^-1) for 8.

________________________________________________________________

x y z U(eq)

________________________________________________________________

H(2) 703 102 3181 35

H(4) 2271 2906 3761 36

H(6) 3755 1270 2296 35

H(11) 1855 -880 2450 37

H(31) 716 2185 4466 36

H(51) 4943 3043 2872 39

HT1A 4850 -1407 1276 74

HT1B 4352 -2037 416 74

HT1C 5349 -2272 1015 74

HT1D 3014 -3080 2018 77

HT1E 4018 -2057 2275 77

HT1F 4553 -2894 1973 77

HT1G 3682 -3858 581 81

HT1H 2604 -3614 34 81

HT1I 2172 -4017 674 81

HT2A -1595 -3999 81 145

HT2B -221 -4175 405 145

HT2C -279 -3645 -200 145

HT2D -1054 -2157 216 134

HT2E -1010 -1776 1084 134

HT2F -2108 -2726 564 134

HT2G -1340 -3328 1539 169

HT2H 0 -2500 2021 169

HT2I 97 -3495 1673 169

HT2J -1582 -3857 -41 93

HT2K -57 -3774 -77 93

HT2L -719 -3043 -277 93

HT2M -941 -1799 748 121

HT2N -682 -1844 1588 121

HT2O -1965 -2574 951 121

HT2P -1248 -3831 1266 106

HT2Q 104 -3146 1877 106

HT2R 192 -3931 1193 106

H(12A) 2537 -1468 -144 56

H(12B) 2135 -775 -547 56

H(12C) 1056 -1369 -226 56

H(12D) 801 519 844 63

H(12E) 1563 822 252 63

H(12F) 2201 1339 1132 63

H(12G) 4892 986 1427 55

H(12H) 4646 776 539 55

H(12I) 5021 62 923 55

HT3A -2296 206 5816 97

HT3B -1267 385 5308 97

HT3C -2856 -80 4924 97

HT3D -4035 1089 5907 83

HT3E -4476 791 5010 83

HT3F -3967 1848 5494 83

HT3G -1575 2636 6209 145

HT3H -473 2114 6225 145

HT3I -1672 1873 6619 145

HT3J -2731 40 5627 96

HT3K -1732 151 5094 96

HT3L -3319 -47 4770 96

HT3M -4258 1346 5441 129

HT3N -3117 2192 6074 129

HT3O -3508 1210 6189 129

HT3P -600 2384 6186 133

HT3Q -214 1513 5782 133

HT3R -910 1504 6461 133

HT4A -3119 2400 3231 63

HT4B -1499 2772 3460 63

HT4C -2342 3474 3532 63

HT4D -214 3634 4798 84

HT4E -978 3713 5453 84

HT4F -1144 4280 4882 84

HT4G -3746 3563 4467 78

HT4H -3536 3114 5121 78

HT4I -4390 2486 4288 78

H(32A) -2046 876 2068 61

H(32B) -2628 -208 1697 61

H(32C) -1037 284 2060 61

H(32D) -1206 -1046 3064 72

H(32E) -2800 -1475 2683 72

H(32F) -2250 -1057 3577 72

H(32G) -4105 89 3563 60

H(32H) -4610 -249 2667 60

H(32I) -3990 818 3119 60

HT5A 4472 6256 3660 80

HT5B 5307 6751 3175 80

HT5C 5814 7110 4072 80

HT5D 8053 6962 4067 108

HT5E 7633 6648 3169 108

HT5F 8247 6043 3596 108

HT5G 6629 6223 4771 104

HT5H 6898 5294 4391 104

HT5I 5380 5313 4338 104

HT5J 5953 6628 4548 169

HT5K 5065 5573 4267 169

HT5L 4651 6248 3846 169

HT5M 6133 6804 2986 139

HT5N 7462 6501 2988 139

HT5O 7388 7234 3715 139

HT5P 7861 6120 4527 111

HT5Q 8189 5738 3743 111

HT5R 7187 5065 4045 111

HT6A 6025 4925 870 108

HT6B 6369 5707 1655 108

HT6C 4833 5089 1243 108

HT6D 7757 4383 1493 118

HT6E 7522 3959 2152 118

HT6F 7983 5041 2323 118

HT6G 4087 3404 1150 167

HT6H 5189 2990 1486 167

HT6I 5292 3313 764 167

H(52A) 812 2584 1609 62

H(52B) -261 3060 1864 62

H(52C) 331 2494 2344 62

H(52D) 2857 5379 2372 72

H(52E) 1264 4952 1986 72

H(52F) 2300 4548 1603 72

H(52G) 1350 4077 3803 68

H(52H) 764 4719 3410 68

H(52I) 2328 5049 3853 68

________________________________________________________________
